# Supplementary material
Source: ML conference proceedings conference paper supplement (https://openreview.net/forum?id=PcNpL9Q39p)

CVaR Objective

T (number of rounds)

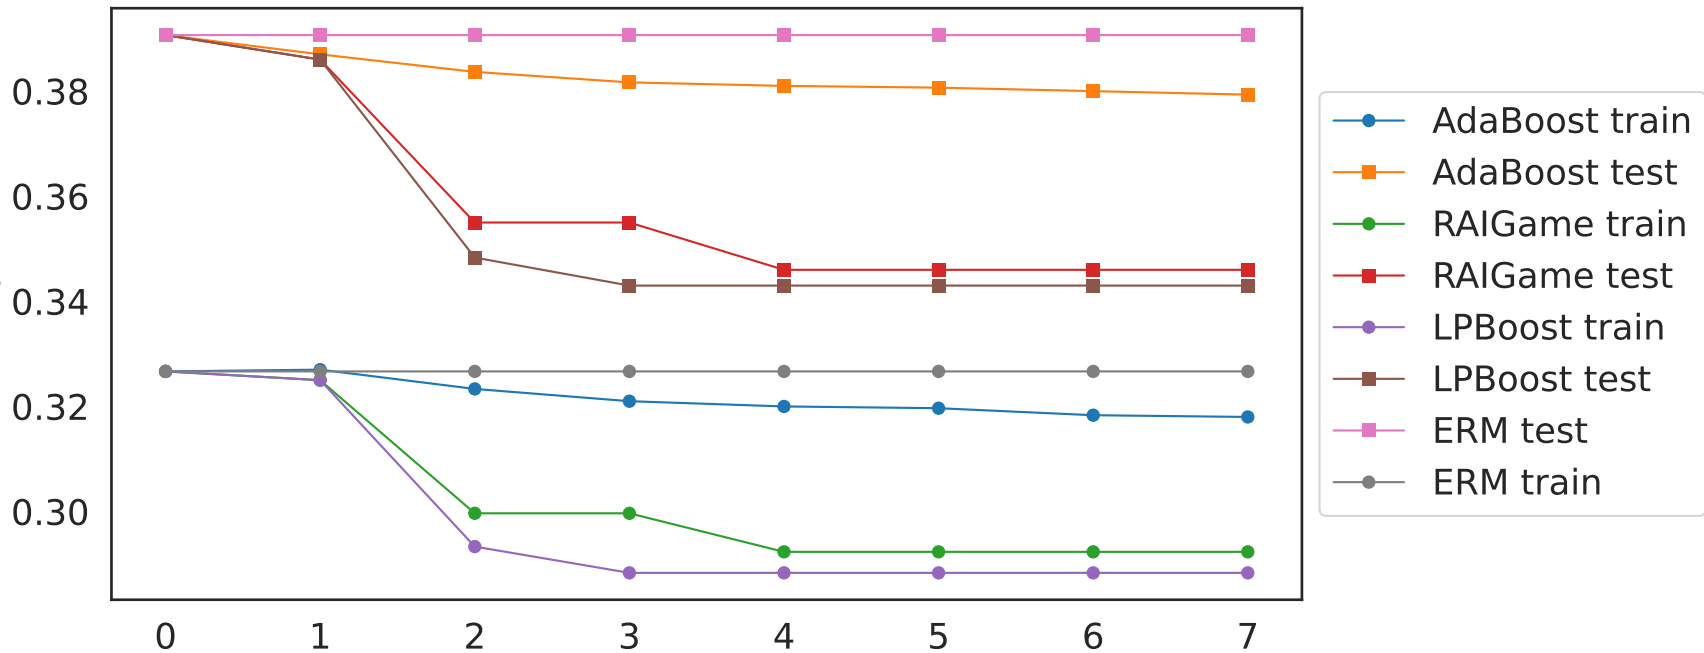

Supplement: supplementary_material [file attachment]

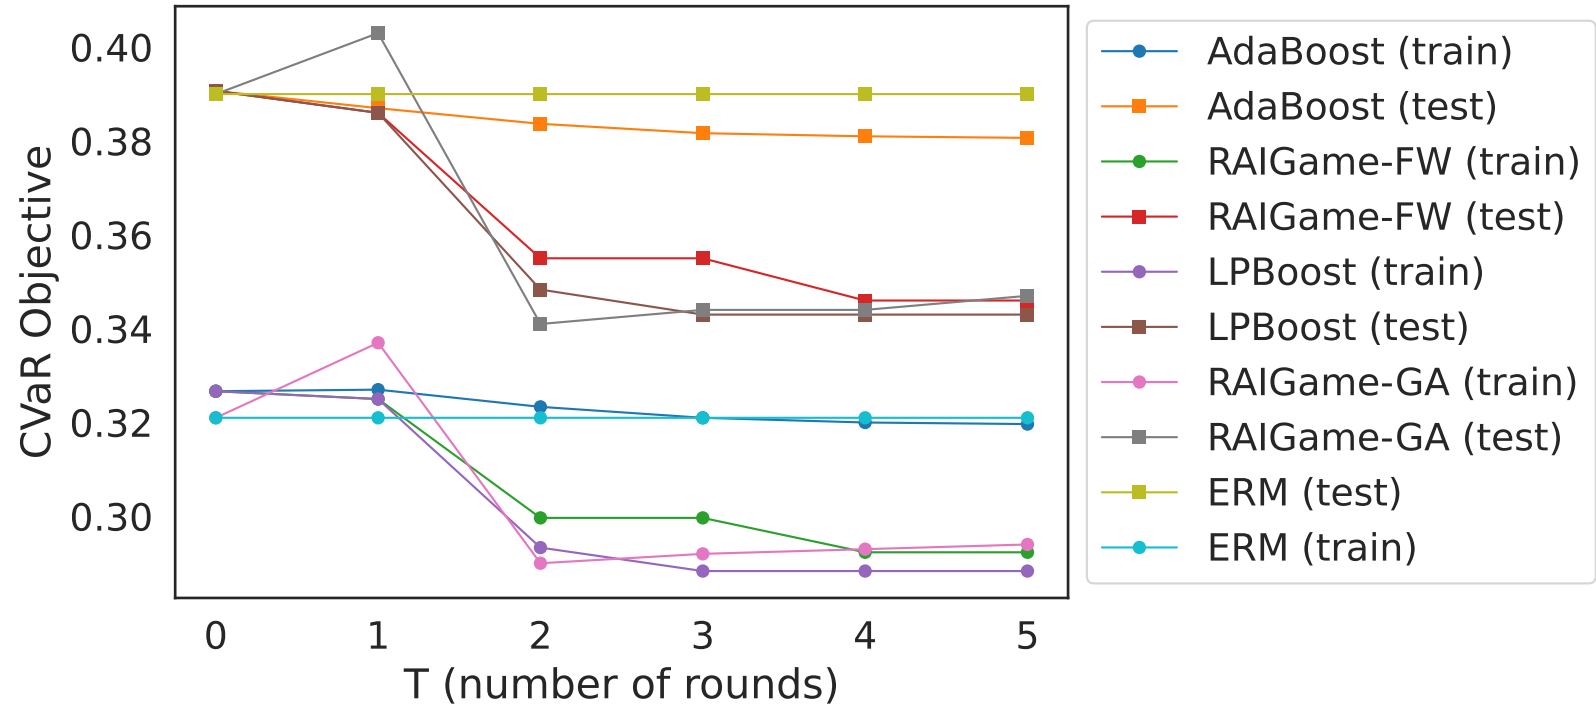

Supplement: supplementary_material [file attachment]

Group DRO Objective

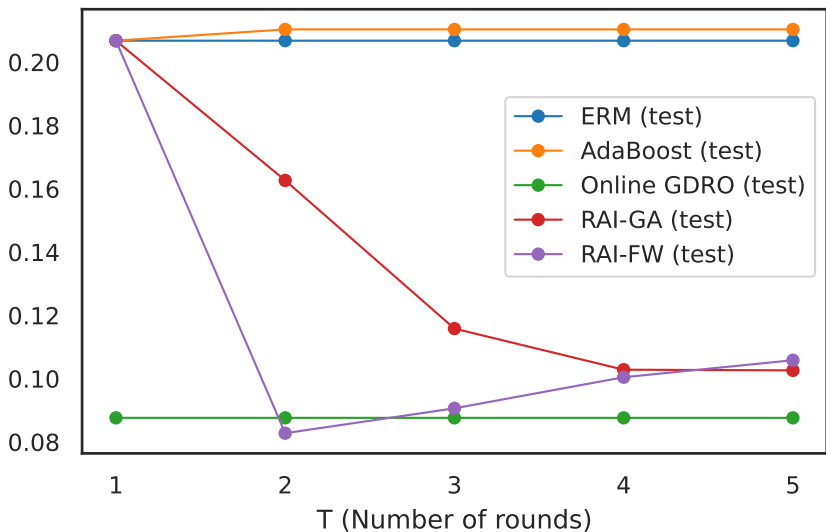

Supplement: supplementary_material [file attachment]

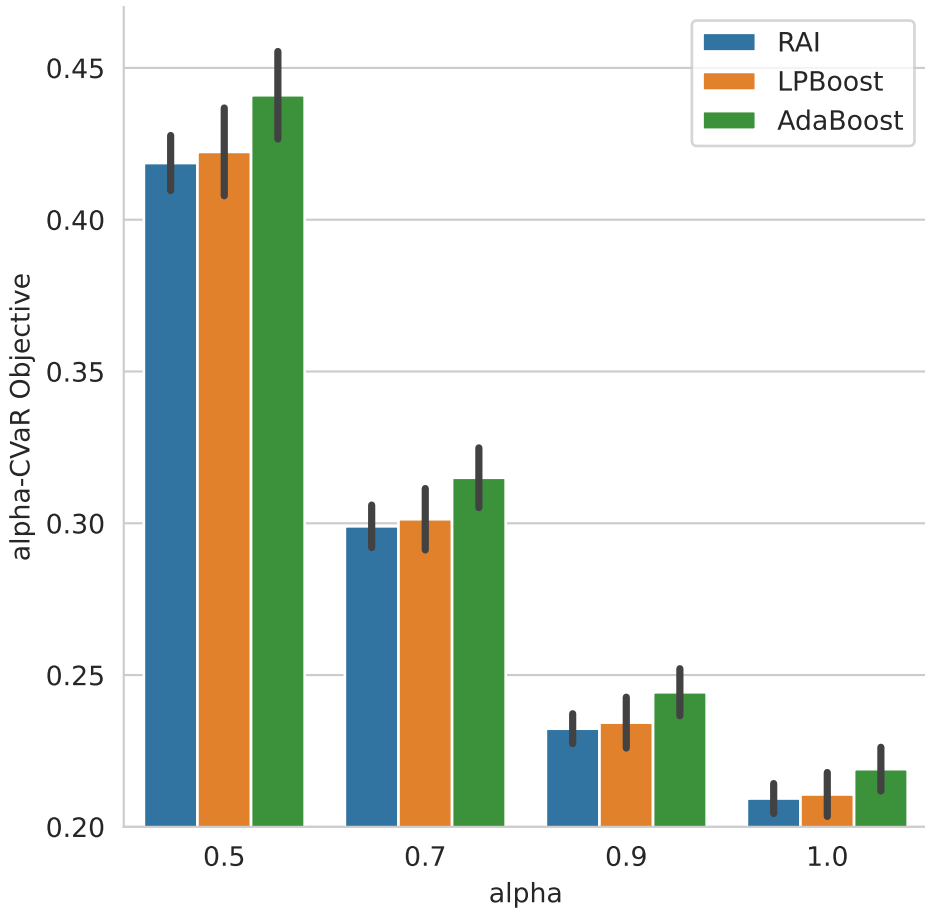

Supplement: supplementary_material [file attachment]

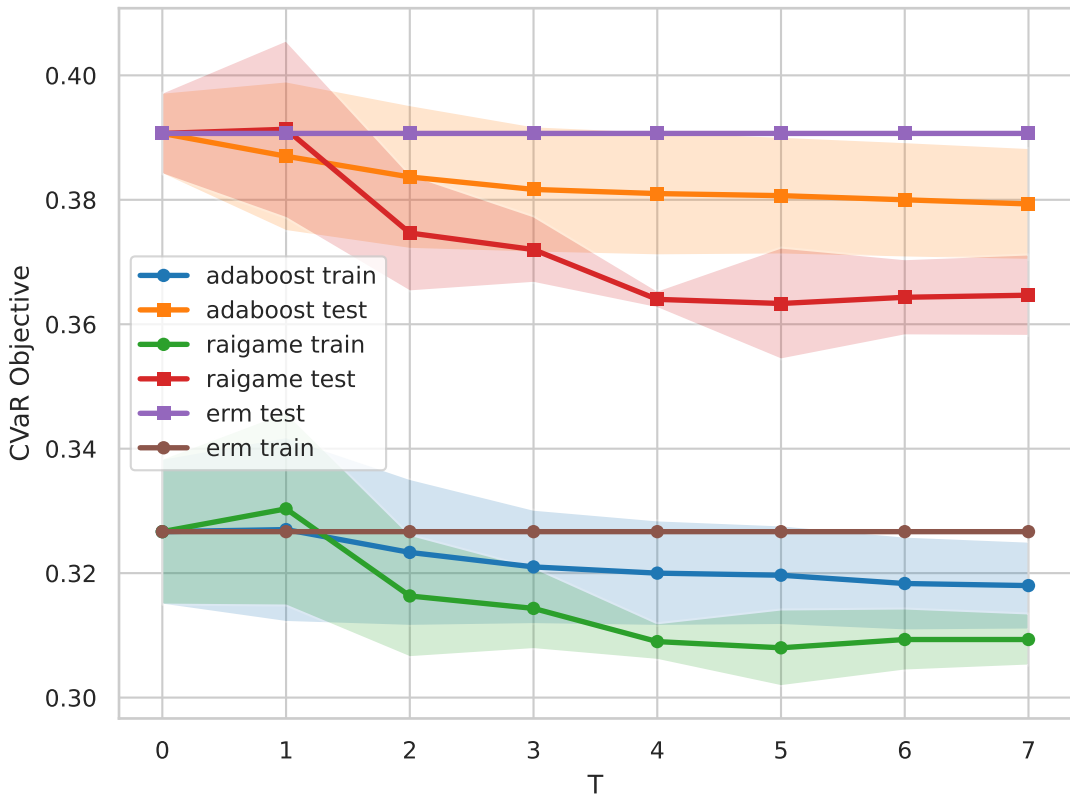

Supplement: supplementary_material [file attachment]

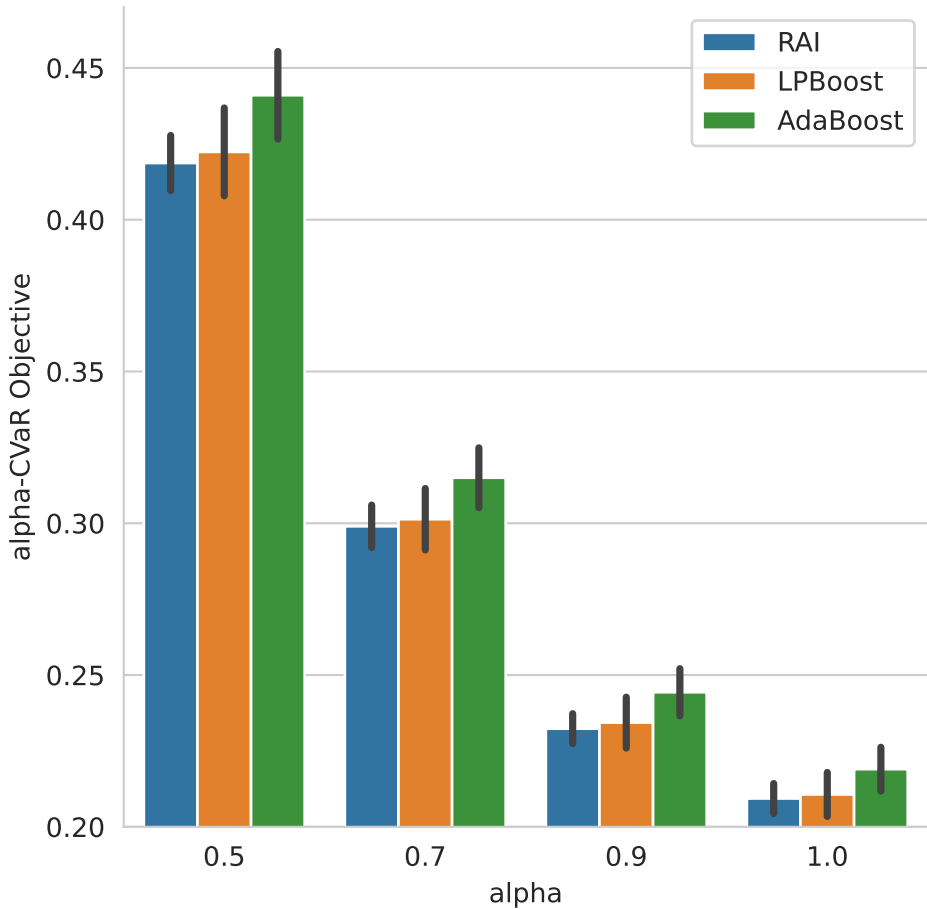

Supplement: supplementary_material [file attachment]
